# Supplementary material for: Development of MetaXplore: An Interactive Tool for Targeted Metagenomic Analysis
Source: MDPI journal article supplement (doi:10.3390/cimb46050289), 2024-05-15
Supplement: s1 [file s1]

## Supplementary Materials

### Development of MetaXplore: An Interactive Tool for targeted metagenomic Analysis

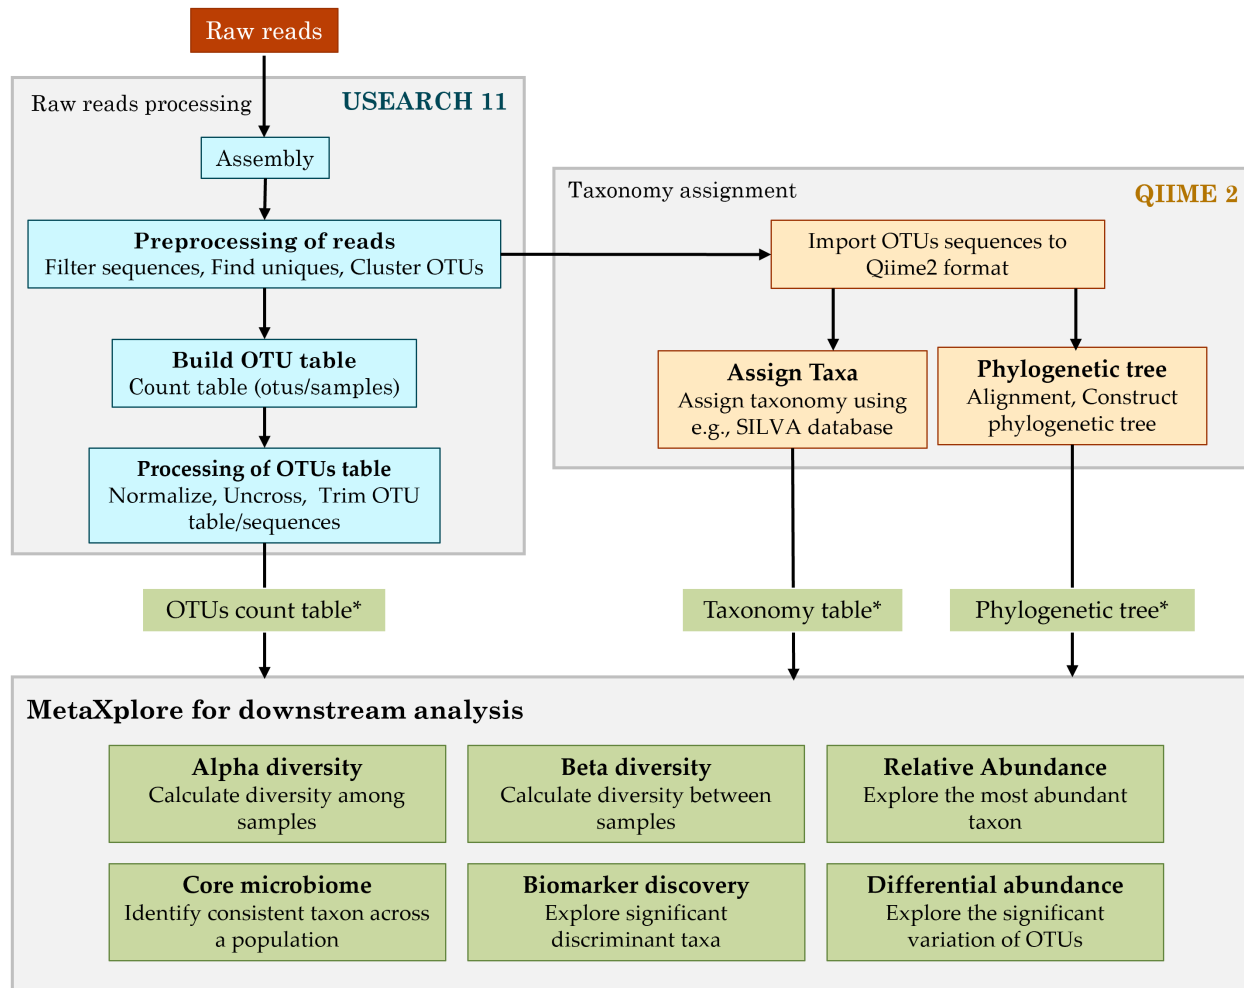

\*: MetaXplore input files

Figure S1: Exemplar pipeline to generate MetaXplore input files.

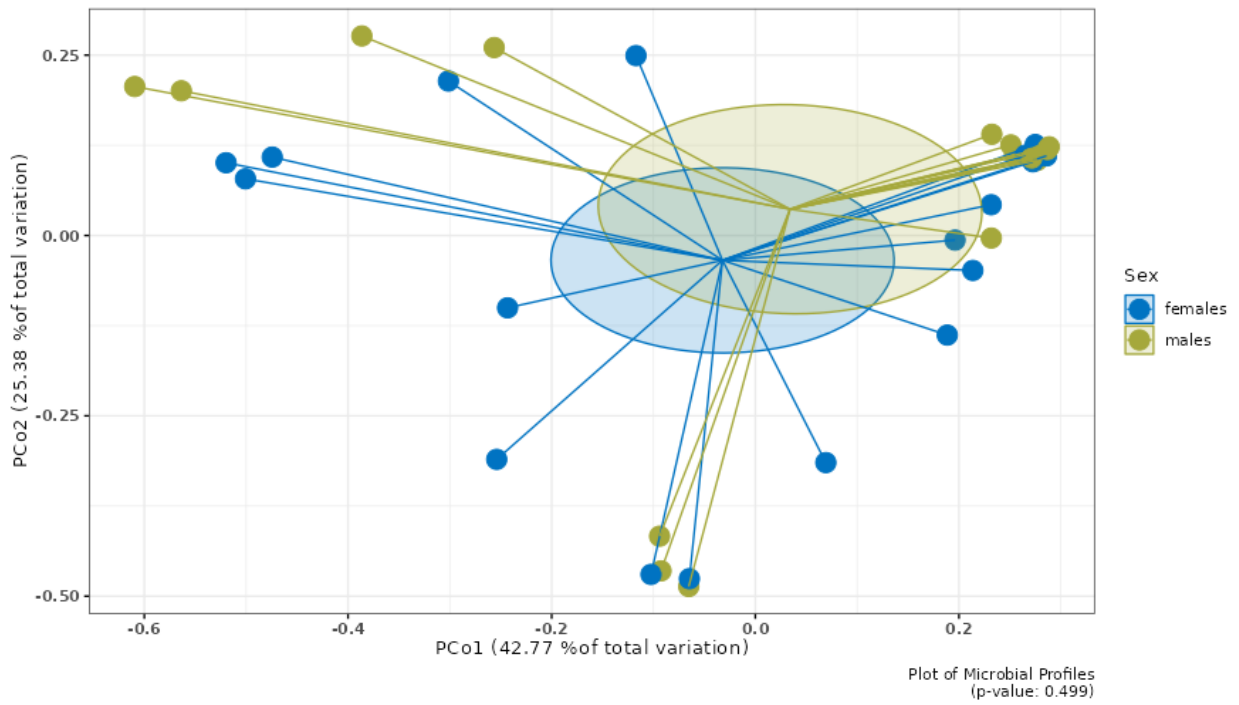

Figure S2: Principal Coordinates Analysis (PCoA) of bacterial diversity between males and females.
